# Supplementary material for: Hydrophobically associated hydrogels based on acrylamide and anionic surface active monomer with high mechanical strength
Source: Royal Society of Chemistry journal article supplement (doi:10.1039/c2sm07200a), 2012-01-01
Supplement: c2sm07200a.pdf [file c2sm07200a.pdf]

## Supporting Information

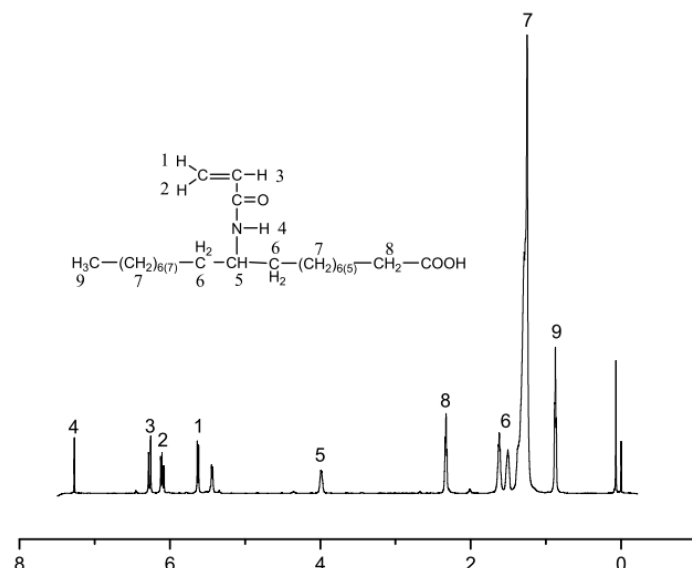

**Figure S1.**  $^1\text{H}$ -NMR spectrum of AAS ( $\text{CDCl}_3$ ,  $\delta$ : ppm): 7.20 ( $-\text{NH}-$ ), 6.11 and 5.62 ( $-\text{CH}=\text{CH}_2$ ), 6.45 ( $-\text{CH}=\text{CH}_2$ ), 1.28 ( $-(\text{CH}_2)_{6(5)}-$ ) and ( $-(\text{CH}_2)_{6(7)}-$ ), 3.98 ( $-\text{CH}-$ ), 0.89 ( $-\text{CH}_3$ ). The Double bond content is about 98%, which is calculated by NMR using the peak areas ratio of the protons of double bond at 6.11 - 5.62 vs the protons of ( $-(\text{CH}_2)_{6(5)}-$ ) and ( $-(\text{CH}_2)_{6(7)}-$ ) at 1.28 and then multiplying by a factor of 6 .

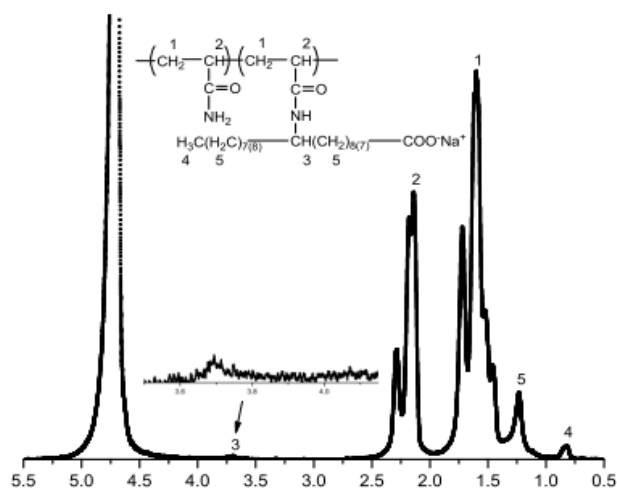

**Figure S2.**  $^1\text{H}$ -NMR spectrum of copolymer containing NaAAS.

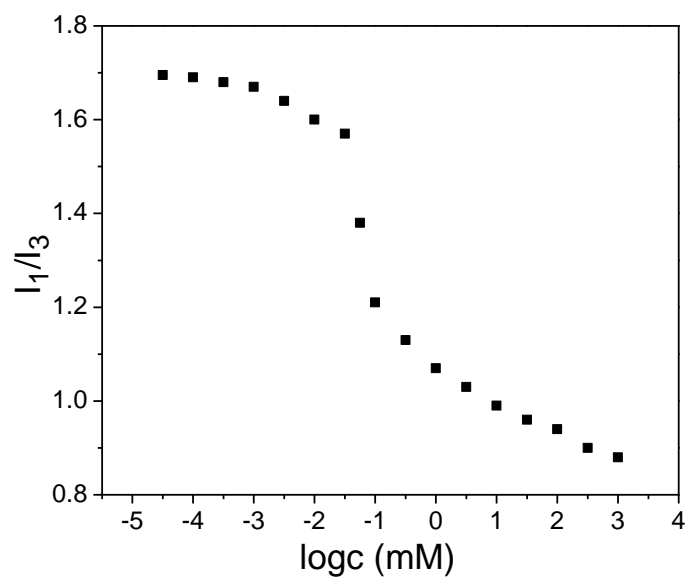

**Figure S2.**  $I_1/I_3$  and conductivity vs concentration of nonionic surfmer NaAAS in aqueous solution ( $T = 25\text{ }^{\circ}\text{C}$ ).

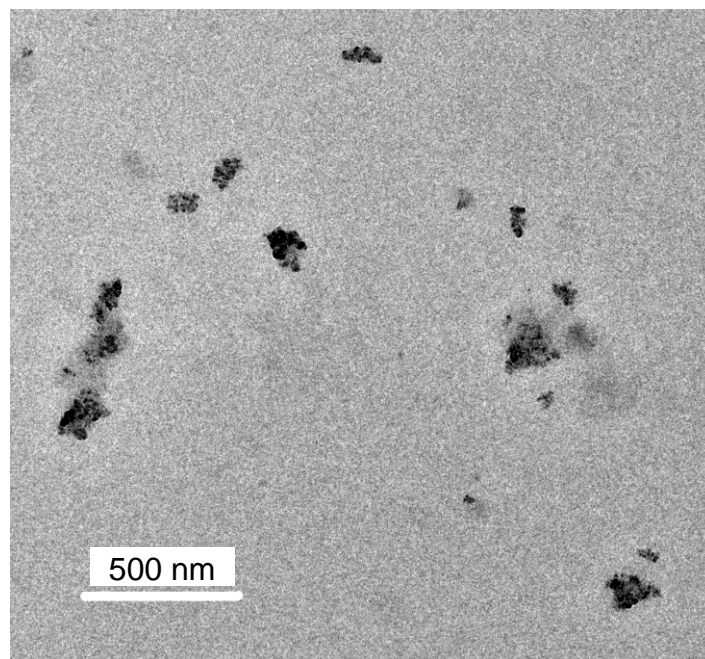

**Figure S4.** TEM image of micelle aggregates
